# Supplementary material for: The Probiotic Potential of Enterococcus faecium 140623, the Production Strain for Lactasin Tablets: Safety Assessment and Modulating Host Metabolism
Source: Research Square preprint supplement (doi:10.21203/rs.3.rs-7920991/v1), 2025-11-05
Supplement: Supplementary file 1 [file f155294e56a0163f238e8baf.xlsx]

## Sheet: Table S1
Table S1 Putative antibiotic resistance genes identified in the genome of E. faecium 140623
Gene ID	Gene	Antibiotics	Product	Identity(%)
contig_1_polypolish_552	msrC	macrolide, streptogramin	L-methionine (R)-S-oxide reductase	96.3
contig_1_polypolish_886	aac(6')-Ii	aminoglycoside	aminoglycoside 6'-N-acetyltransferase	98.9

## Sheet: Table S2
Table S2 Antibiotic sensitivity test of 11 antibiotics to E. faecium 140623
Antibiotic/Drug content	Drug-resistant zone diameter (mm)					Results
	Duplicate 1	Duplicate 2	Duplicate 3	Mean	± SD
Penicillin/10µg	9.02	9.24	9.18	9.14667	0.113725	R
Ampicillin/10µg	27.55	26.27	27.19	27.0033	0.660101	S
Cefoperazone/75µg	15.28	15.8	15.72	15.6	0.28	I
Ciprofloxacin/5µg	18.1	17.68	18.4	18.06	0.361663	I
Erythromycin/15µg	11.12	11.31	11.47	11.3	0.175214	R
Clarithromycin/15µg	11.96	12.41	12.47	12.28	0.278747	R
Azithromycin/15µg	10.81	10.31	10.96	10.6933	0.340343	R
Tetracycline/30µg	30.34	31.57	31.56	31.1567	0.707272	S
Vancomycin/30µg	26.18	26.21	26.13	26.1733	0.0404145	S
Gentamicin/10µg	9.7	9.74	9.31	9.58333	0.237557	I
Streptomycin/10µg	10.51	9.62	9.78	9.97	0.474447	R
S: sensitive, I: intermediary, R: resistant. The diameter of drug sensitive tablets was 6 mm.

## Sheet: Table S3
Table S3 Putative virulence factors in the E. faecium 140623 genome
Gene ID	Gene	Predicted functions	Identity(%)
contig_1_polypolish_55	bopD	sugar-binding transcriptional regulator, LacI family	86.6
contig_1_polypolish_976	clpP	ATP-dependent Clp protease proteolytic subunit	81.1

## Sheet: Table S4
Table S4 Putative prophage regions in the E. faecium 140623 genome
Region Length	Completeness	Score	Total Proteins	Most Common Phage	GC(%)
19.2Kb	questionable	90	16	PHAGE_Staphy_SPbeta_like_NC_029119(4)	34.64
12.4Kb	questionable	70	16	PHAGE_Staphy_SPbeta_like_NC_029119(5)	34.83
41.8Kb	intact	120	57	PHAGE_Entero_vB_IME197_NC_028671(11)	36.18
26.8Kb	questionable	80	28	PHAGE_Bacill_BCJA1c_NC_006557(7)	34.44

## Sheet: Table S5
Table S5 Putative CRISPR regions in the E. faecium 140623 genome
Element	CRISPR Id /Cas Type	Start	End	Spacer /Gene	Repeat consensus /cas genes	Direction	Evidence Level
CRISPR	contig_1_polypolish_1	837044	837156	1	AGATGATGAACAATACTGGTTGAGCAAAG	ND	1
CRISPR	contig_1_polypolish_2	1494717	1494810	1	TGCAGCAGAGACAACACCTTCTTCCTCA	+	1
CRISPR	contig_2_polypolish_1	84428	84556	2	GGTATGATTTTCATACCCTCTTGA	-	1

## Sheet: Table S6
Table S6 Putative secondary metabolite gene clusters in the E. faecium 140623 genome
Region	Type	From	To	Most similar known cluster	Similarity
310.1	RiPP-like	881582	883735	ABC transporter related protein	1
503.1	T3PKS	1457048	1458202	hydroxymethylglutaryl-CoA synthase	1
806.1	RRE-containing	2404660	2405787	Pantocin/Microcin RRE	1

## Sheet: Table S7
Table S7 Putative bacteriocin in the E. faecium 140623 genome
AOI	Gene-start	Gene-end	Class
contig_2_polypolish.0.AOI_01	49522	70065	62.3;enterolysin_A
contig_1_polypolish.1.AOI_01	863603	883792	81.2;Enterocin_A
contig_1_polypolish.1.AOI_02	1313792	1333981	91.2;Enterocin_P

## Sheet: Table S8
Table S8 Bacteriostatic activity of E. faecium 140623
Indicator bacteria	inhibition zone diameter (mm)
	Duplicate 1	Duplicate 2	Duplicate 3	Mean	± SD
Enterococcus durans ATCC 19432	12.1	11.88	11.9	11.96	0.121655
Listeria monocytogenes ATCC 19115	14.1	13.98	13.52	13.8667	0.306159
Staphylococcus aureus ATCC25923	10.96	10.84	10.74	10.8467	0.110151
Clostridium perfringens ATCC13124	11.24	11.1	10.96	11.1	0.14
Escherichia coli ATCC8739	12.34	11.82	12.18	12.1133	0.266333
Salmonella typhimurium ATCC14028	11.28	11.56	11.8	11.5467	0.260256
